# Supplementary figures and images for: Two Novel Semisynthetic Lipoglycopeptides Active against Staphylococcus aureus Biofilms and Cells in Late Stationary Growth Phase
Source: MDPI journal article supplement (doi:10.3390/ph14111182), 2021-11-19

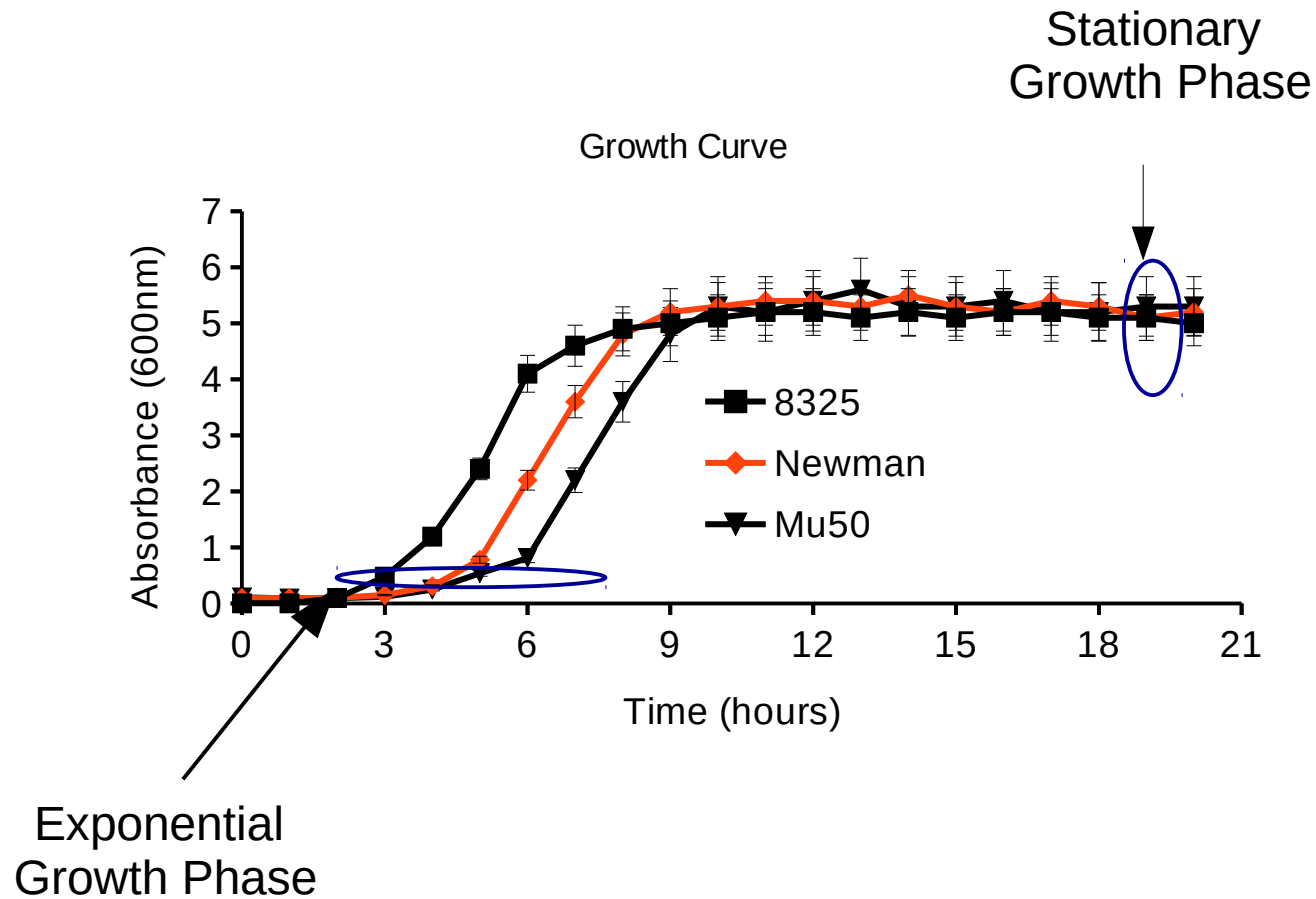

Supplement: s1 [file s1]
